# Supplementary material
Source: PubMed Central journal article supplement (PMC10991145)
Supplement: 262_2022_3334_MOESM1_ESM.pdf [file 262_2022_3334_MOESM1_ESM.pdf]

# **Oncolytic virus-mediated reducing of myeloid-derived suppressor cells enhances the efficacy of PD-L1 blockade in gemcitabine-resistant pancreatic cancer**

Yoshinori Kajiwara<sup>1</sup>, Hiroshi Tazawa<sup>1,2</sup>, Motohiko Yamada<sup>1</sup>, Nobuhiko Kanaya<sup>1</sup>, Takuro Fushimi<sup>1</sup>, Satoru Kikuchi<sup>1</sup>, Shinji Kuroda<sup>1</sup>, Toshiaki Ohara<sup>1,3</sup>, Kazuhiro Noma<sup>1</sup>, Ryuichi Yoshida<sup>1</sup>, Yuzo Umeda<sup>1</sup>, Yasuo Urata<sup>4</sup>, Shunsuke Kagawa<sup>1</sup>, Toshiyoshi Fujiwara<sup>1</sup>

<sup>1</sup>Department of Gastroenterological Surgery, and <sup>3</sup>Department of Pathology and Experimental Medicine, Okayama University Graduate School of Medicine, Dentistry and Pharmaceutical Sciences, Okayama 700-8558, Japan.

<sup>2</sup>Center for Innovative Clinical Medicine, Okayama University Hospital, Okayama 700-8558, Japan.

<sup>4</sup>Oncolys BioPharma Inc., Tokyo 105-001, Japan.

## **Materials and Methods**

### **Figure S1**

Comparison of GEM resistance and PD-L1 expression  
In parental and GEM-resistant PDAC tumors.

### **Figure S2**

Comparison of the expression of 40 cytokines  
between P and GR PAN02 conditioned medium using a cytokine array.

### **Figure S3**

Increased proportions of MDSCs and granulocytic MDSCs  
among BMDCs incubated with GR PAN02 CM.

### **Figure S4**

Increased proliferation of and proportion of PD-L1<sup>+</sup> MDSCs and decreased proliferation of CD8<sup>+</sup> T cells  
among BMDCs incubated with GR PAN02 CM.

### **Figure S5**

Relative viability of GR PAN02 cells after treatment with GM-CSF or anti-GM-CSF antibody for 3 days.

### **Figure S6**

Decreased proportion of granulocytic MDSCs, decreased proliferation of MDSCs,  
and increased proliferation of CD8<sup>+</sup> T cells among GR PAN02 CM-incubated BMDCs  
after OBP-702 treatment.

### **Figure S7**

Relative cell viability of BMDCs and MDSCs after treatment with OBP-301 or OBP-702 for 3 days.

### **Figure S8**

*In vivo* antitumor effect of OBP-301 and OBP-702 against GR PAN02 tumors.

### **Figure S9**

*In vivo* antitumor effect of PD-L1 blockade and OBP-702  
in monotherapy or combination therapy against GR PAN02 tumors.

## Materials and Methods

### MDSC proliferation assay

MDSCs were isolated from the spleens of healthy 6- to 8-week-old female C57BL/6J mice using a mouse MDSC isolation kit (130-094-538; Miltenyi Biotec, Auburn, CA, USA) and then labeled with CFSE (Invitrogen, Carlsbad, CA, USA). The CFSE-labeled MDSCs were cultured in parental or GEM-resistant PAN02 CM or culture medium containing GM-CSF (40 ng/mL). After incubation for 4 days, MDSC proliferation was assessed by measuring the proportion of CFSE<sup>-</sup> cells using a flow cytometry (BD FACSLytic; BD Biosciences).

### T-cell suppression assay

CD8<sup>+</sup> T cells were isolated from the spleens of healthy 6- to 8-week-old female C57BL/6J mice using a mouse CD8<sup>+</sup> isolation kit (130-104-075; Miltenyi Biotec), and labeled with CFSE. The CFSE-labeled CD8<sup>+</sup> T cells were incubated in 24-well plates with CD3/CD28 beads (11456D; Thermo Fisher Scientific, Waltham, MA, USA) and MDSCs induced by parental or GEM-resistant PAN02 CM. After incubation for 4 days, the cells were stained with anti-CD8 antibody, and the CFSE fluorescence intensity of the CD8<sup>+</sup> T cells was examined using a flow cytometry (BD FACSLytic; BD Biosciences).

### Isolation of MDSCs

BMDCs were derived from healthy 6- to 8-week-old female C57BL/6J mice and incubated with GEM-resistant PAN02 CM. After incubation for 4 days, cells were collected and stained with Fixable Dye (423102; BioLegend, San Diego, CA, USA), anti-CD11b antibody (101206; BioLegend), and anti-Gr1 antibody (108436; BioLegend). The proportion of CD11b<sup>+</sup>Gr1<sup>+</sup> MDSCs was determined by flow cytometry (BD FACSAria III cell sorter; BD Biosciences) according to the manufacturer's protocol. Cell purity (> 97%) and viability were assessed by flow cytometry (BD FACSLytic; BD Biosciences).

### Cell viability assay

Cells were seeded in 96-well plates at a density of  $1 \times 10^3$  cells/well (PAN02) or  $1 \times 10^4$  cells/well (BMDC, MDSC). Cells were treated with recombinant GM-CSF at 0, 1, 5, 10, 50, or 100 ng/mL or anti-GM-CSF neutralizing antibody at 0, 1, 5, 10, 50, or 100  $\mu$ g/mL or infected with OBP-301 or OBP-702 at a MOI of 0, 1, 5, 10, 50, or 100 PFUs/cell. Cell viability was determined 3 days after treatment using TACS<sup>®</sup> XTT Cell Proliferation Assay (R&D Systems, Minneapolis, MN, USA) according to the manufacturer's protocol.

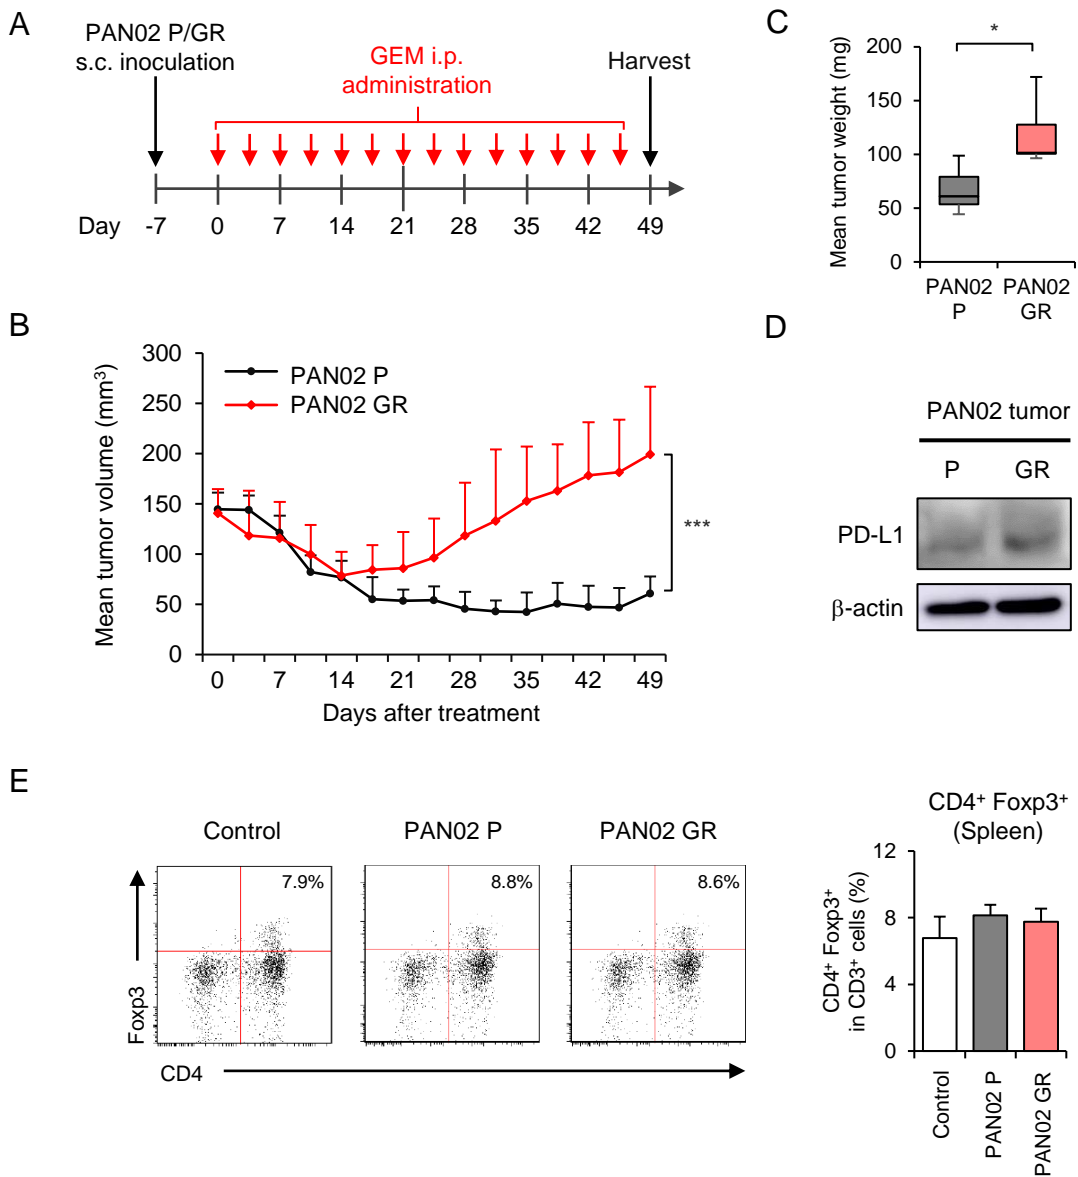

**Supplementary Fig. S1. Comparison of GEM resistance and PD-L1 expression in parental and GEM-resistant PAN02 tumors.** **A**, Parental (P) and GEM-resistant (GR) PAN02 cells ( $4 \times 10^6$  cells) were subcutaneously (s.c.) inoculated into the flanks of C57BL/6J mice. Seven days after inoculation, a 100- $\mu$ L volume of solution containing gemcitabine (GEM, 100 mg/kg) was intraperitoneally (i.p.) administered twice a week for 7 weeks (red arrows). **B** and **C**, Growth curves (**B**) and weight (**C**) of P and GR PAN02 tumors are shown. **D**, Expression of PD-L1 protein in P and GR PAN02 tumors.  $\beta$ -Actin was used as a loading control. **E**, Representative data of flow cytometric analysis for CD4 and Fxp3. The percentage of CD4<sup>+</sup>Fxp3<sup>+</sup> Treg cells among CD3<sup>+</sup> cells is shown. Data are expressed as mean  $\pm$  SD ( $n = 5$  in each group; \*,  $P < 0.05$ ; \*\*\*,  $P < 0.001$ ).

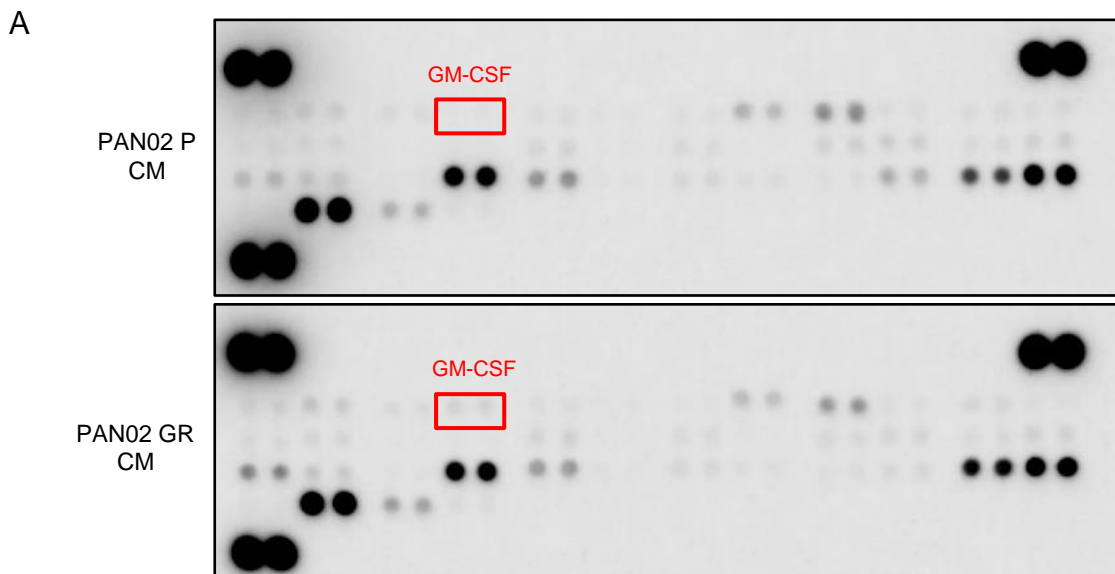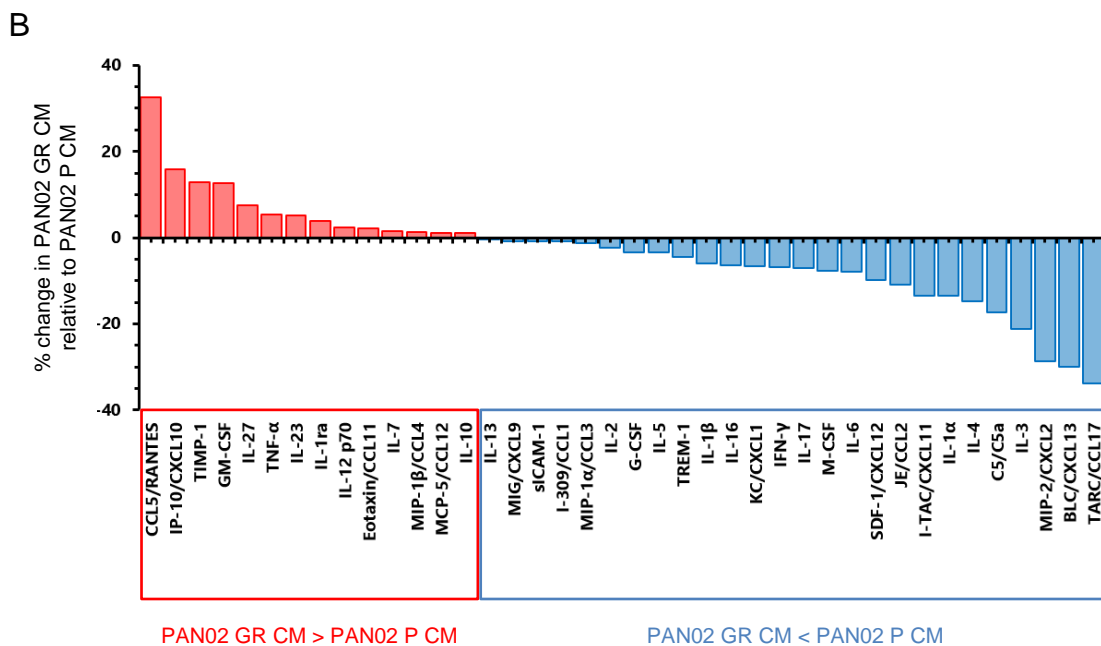

**Supplementary Fig. S2. Comparison of the expression of 40 cytokines between P and GR PAN02 conditioned medium using a cytokine array. A, Data of cytokine array using conditioned medium (CM) from P and GR PAN02 cells. B, Percent change in levels of 40 cytokines in GR PAN02 CM relative to P PAN02 CM. Among 40 cytokines, the expression of 14 was upregulated and 26 downregulated in GR PAN02 CM compared with P PAN02 CM, indicated by red and blue boxes, respectively.**

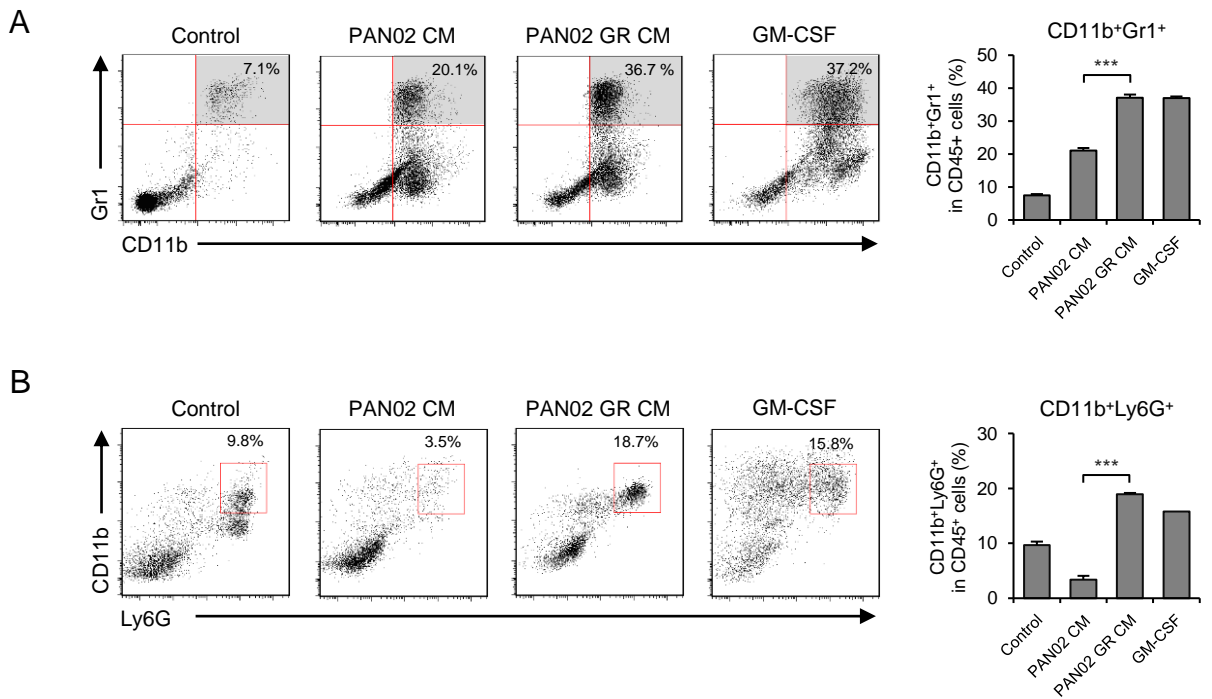

**Supplementary Fig. S3. Increased proportions of MDSCs and granulocytic MDSCs among BMDCs incubated with GR PAN02 CM.** A, B, Representative data of flow cytometric analysis of CD11b, Gr1, and Ly6G in each group. The percentages of CD11b<sup>+</sup>Gr1<sup>+</sup> MDSCs and CD11b<sup>+</sup>Ly6G<sup>+</sup> granulocytic MDSCs among CD45<sup>+</sup> cells are shown. Data are expressed mean  $\pm$  SD (n = 3 in each group; \*\*\*,  $P < 0.001$ ).

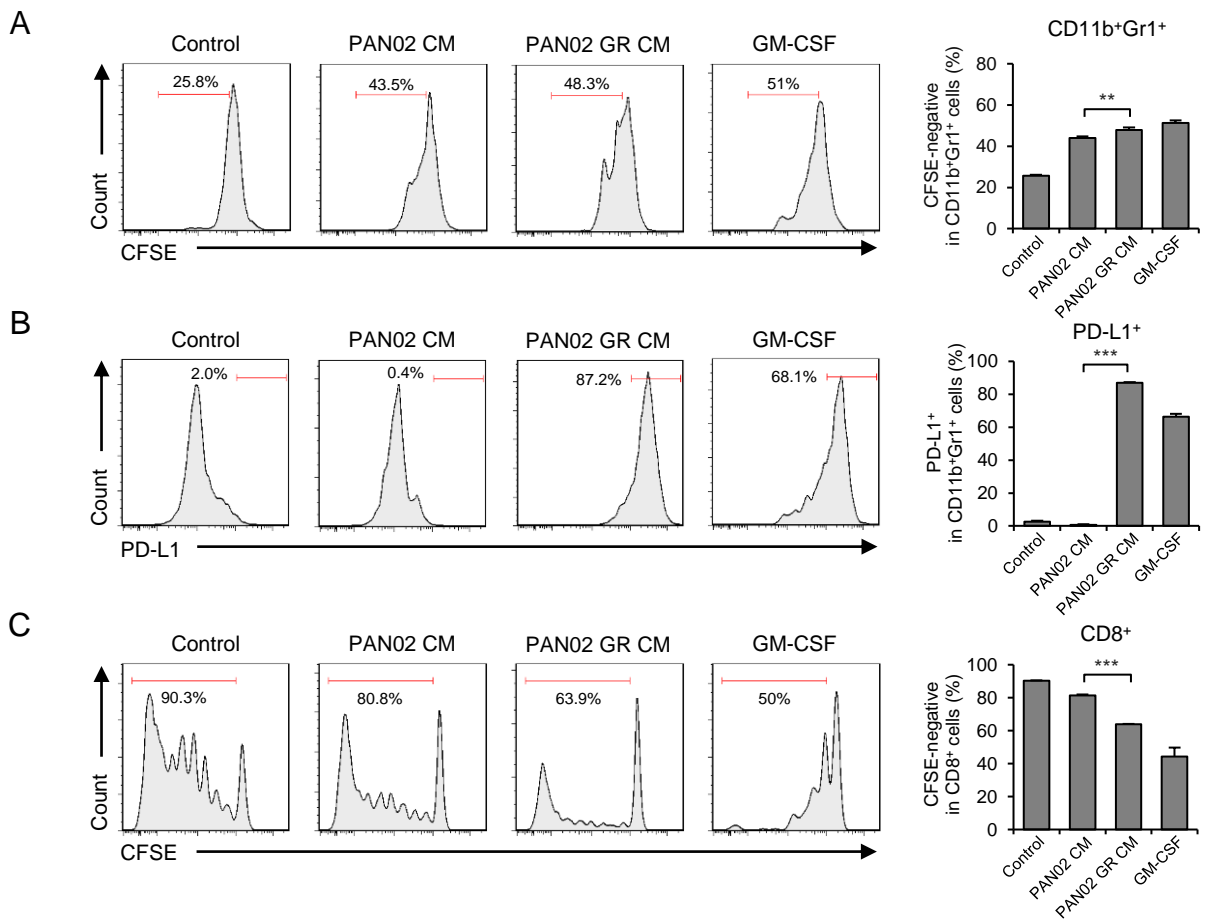

**Supplementary Fig. S4. Increased proliferation and proportion of PD-L1<sup>+</sup> MDSCs and decreased proliferation of CD8<sup>+</sup> T cells among BMDCs incubated with GR PAN02 CM.**

**A, B, C,** Representative data of flow cytometric analysis for CFSE or PD-L1 in each group. The proportions of CFSE<sup>-</sup> (**A**) and PD-L1<sup>+</sup> (**B**) cells among CD11b<sup>+</sup>Gr1<sup>+</sup> MDSCs and the proportion of CFSE<sup>-</sup> cells (**C**) among CD8<sup>+</sup> T cells are shown. Data are expressed mean  $\pm$  SD (n = 3 in each group; \*\*,  $P < 0.01$ ; \*\*\*,  $P < 0.001$ ).

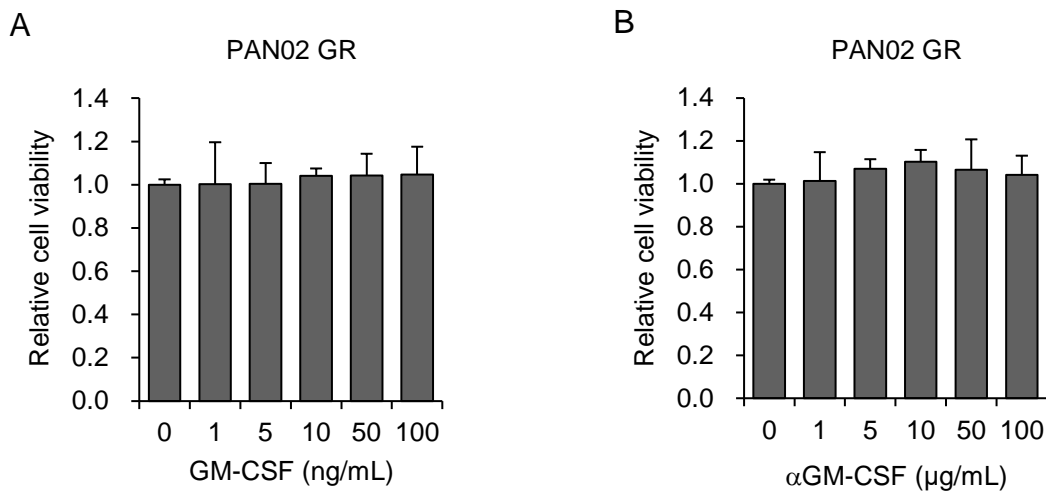

**Supplementary Fig. S5. Relative viability of GR PAN02 cells after treatment with GM-CSF or anti-GM-CSF antibody for 3 days.** A, B, GR PAN02 cells seeded in 96-well plates were treated with recombinant GM-CSF (A) or anti-GM-CSF neutralizing antibody (B) at the indicated doses for 72 h. Cell viability was quantified using the XTT assay and calculated relative to that of non-treated cells, which was set at 1.0. Cell viability data are expressed as mean  $\pm$  SD (n = 5).

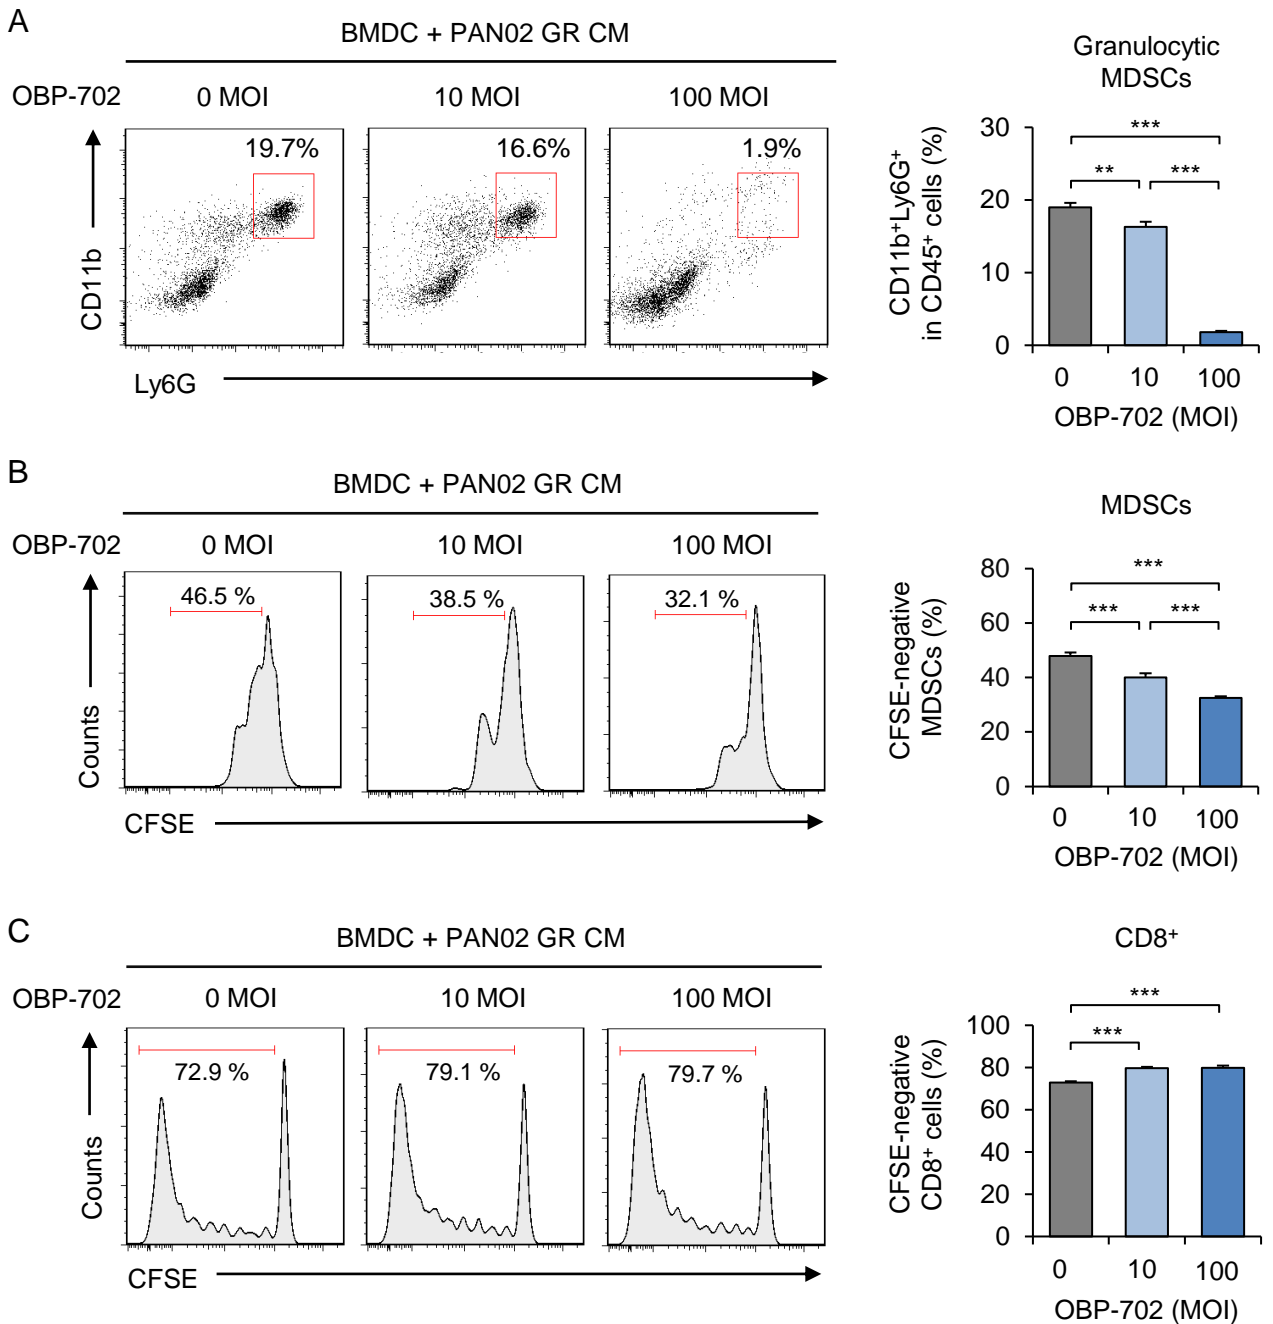

**Supplementary Fig. S6. Decreased proportion of granulocytic MDSCs, decreased proliferation of MDSCs, and increased proliferation of CD8<sup>+</sup> T cells among GR PAN02 CM-incubated BMDCs after OBP-702 treatment.** A, B, C, Representative data of flow cytometric analysis for Ly6G, CD11b, and CFSE in each group. The proportion of CD11b<sup>+</sup>Ly6G<sup>+</sup> cells (A) among CD45<sup>+</sup> cells and the proportion of CFSE<sup>-</sup> cells among MDSCs (B) or CD8<sup>+</sup> T cells (C) are shown. Data are expressed as mean ± SD (n = 3 in each group; \*\*,  $P < 0.01$ ; \*\*\*,  $P < 0.001$ ).



A

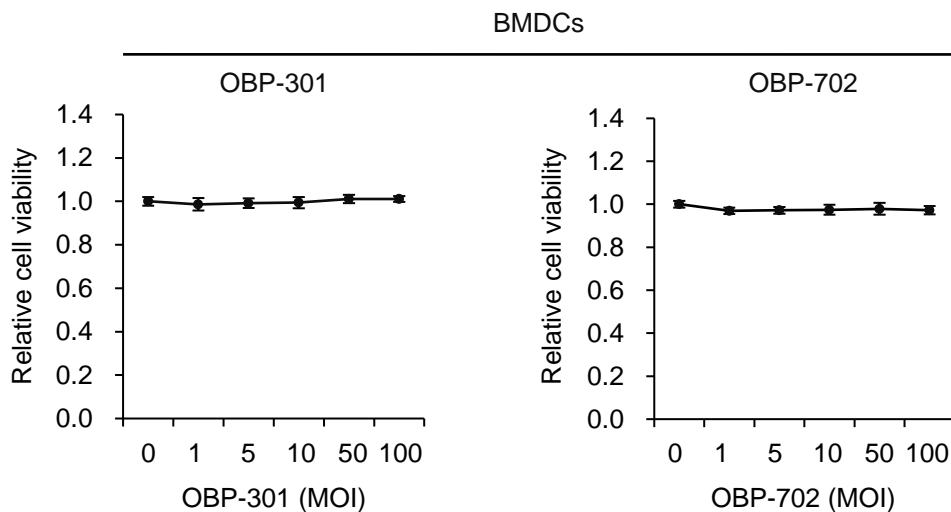

B

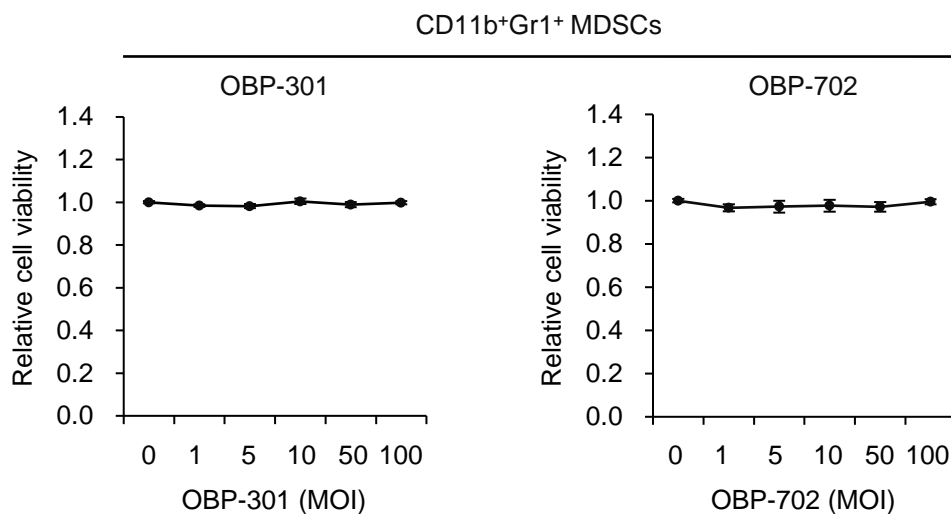

**Supplementary Fig. S7. Relative viability of BMDCs and MDSCs after treatment with OBP-301 or OBP-702 for 3 days.** A, B, BMDCs (A) or CD11b<sup>+</sup>Gr1<sup>+</sup> MDSCs (B) seeded in 96-well plates were treated with OBP-301 or OBP-702 at the indicated MOIs for 72 h. Cell viability was quantified using the XTT assay and calculated relative to that of non-treated cells, which was set at 1.0. Cell viability data are expressed as mean  $\pm$  SD (n = 5).

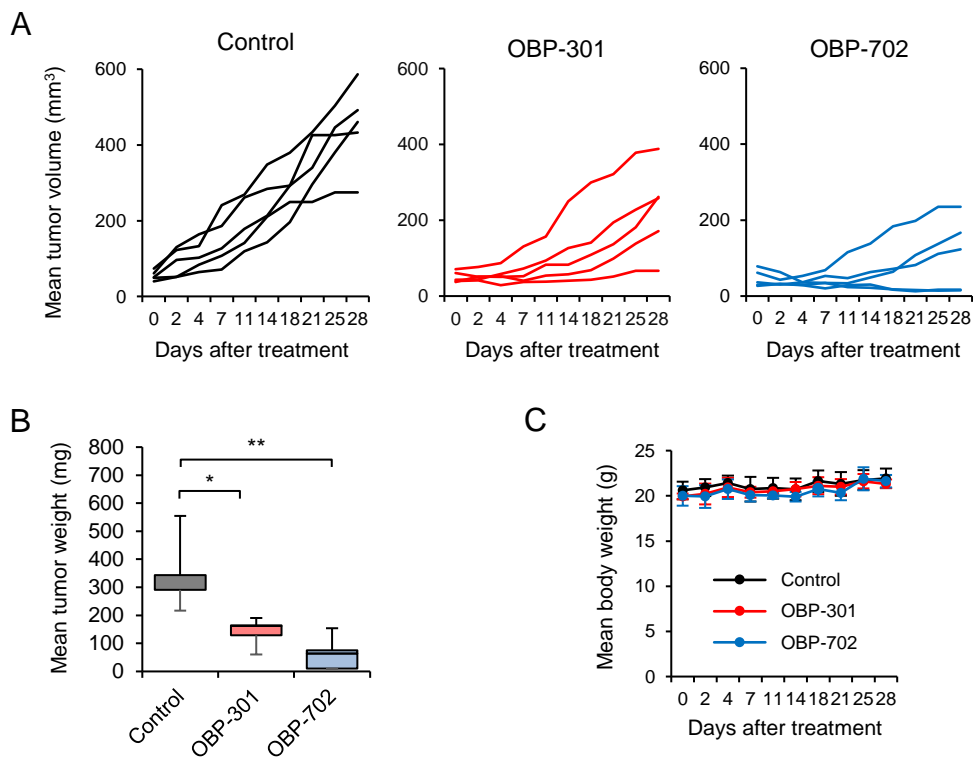

**Supplementary Fig. S8. *In vivo* antitumor effect of OBP-301 and OBP-702 against GR PAN02 tumors. A,** Individual tumor growth curves for GR PAN02 tumors treated with PBS, OBP-301 or OBP-702. **B,** Weight on day 28 of GR PAN02 tumors treated with PBS, OBP-301, or OBP-702. **C,** Change in body weight of mice bearing GR PAN02 tumors treated with PBS, OBP-301, or OBP-702. Data are expressed as mean  $\pm$  SD (n = 5 in each group; \*,  $P < 0.05$ ; \*\*,  $P < 0.01$ ).

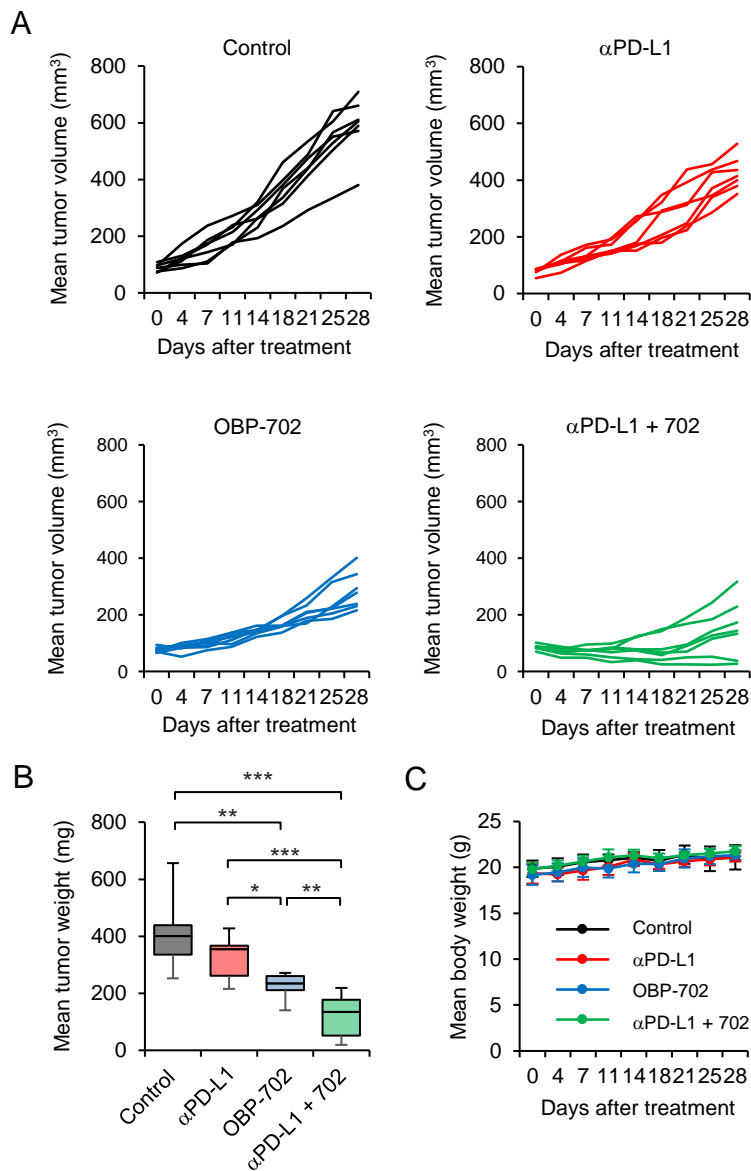

**Supplementary Fig. S9. *In vivo* antitumor effect of PD-L1 blockade and OBP-702 in monotherapy or combination therapy against GR PAN02 tumors. A,** Individual tumor growth curves for GR PAN02 tumors treated with anti-PD-L1 antibody, OBP-702, or combination. **B,** Weight on day 28 of GR PAN02 tumors treated with anti-PD-L1 antibody, OBP-702, or combination. **C,** Change in body weight of mice bearing GR PAN02 tumors treated with anti-PD-L1 antibody, OBP-702, or combination. Data are expressed as mean  $\pm$  SD ( $n = 7$  in each group; \*,  $P < 0.05$ ; \*\*,  $P < 0.01$ ; \*\*\*,  $P < 0.001$ ).
